# Supplementary material
Source: MDPI journal article supplement (https://www.mdpi.com/2674-0311/1/3/15)
Supplement: s1 [file s1 › dietetics-1769986-supplementary.pdf]

## Supplementary

**Table S1.** Search term combinations used in first-round searches.

|                                      | Dementia-related term <sup>a</sup> |                                   |                                      |                                      |                                        |
|--------------------------------------|------------------------------------|-----------------------------------|--------------------------------------|--------------------------------------|----------------------------------------|
|                                      | Dementia                           | Alzheimer's                       | Memory loss                          | Healthy brain                        |                                        |
| Nutrition-related terms <sup>b</sup> | Nutrition                          | Dementia AND ~nutrition           | Alzheimer's AND ~nutrition           | Memory loss AND ~nutrition           | Healthy brain AND ~nutrition           |
|                                      | Food                               | Dementia AND ~food                | Alzheimer's AND ~food                | Memory loss AND ~food                | Healthy brain AND ~food                |
|                                      | Diet                               | Dementia AND ~diet                | Alzheimer's AND ~diet                | Memory loss AND ~diet                | Healthy brain AND ~diet                |
|                                      | Meal                               | Dementia AND ~meal                | Alzheimer's AND ~meal                | Memory loss AND ~meal                | Healthy brain AND ~meal                |
|                                      | Healthy diet                       | Dementia AND ~"healthy diet"      | Alzheimer's AND ~"healthy diet"      | Memory loss AND ~"healthy diet"      | Healthy brain AND ~"healthy diet"      |
|                                      | Healthy eating                     | Dementia AND ~"healthy eating"    | Alzheimer's AND ~"healthy eating"    | Memory loss AND ~"healthy eating"    | Healthy brain AND ~"healthy eating"    |
|                                      | Mediterranean diet                 | Dementia AND "Mediterranean" diet | Alzheimer's AND "Mediterranean" diet | Memory loss AND "Mediterranean" diet | Healthy brain AND "Mediterranean" diet |
|                                      | Vitamins                           | Dementia AND ~vitamins            | Alzheimer's AND ~vitamins            | Memory loss AND ~vitamins            | Healthy brain AND ~vitamins            |
|                                      | Supplements                        | Dementia AND ~supplements         | Alzheimer's AND ~supplements         | Memory loss AND ~supplements         | Healthy brain AND ~supplements         |
|                                      | MIND diet                          | Dementia AND "MIND" diet          | Alzheimer's AND "MIND" diet          | Memory loss AND "MIND" diet          | Healthy brain AND "MIND" diet          |
|                                      | DASH diet                          | Dementia AND "DASH" diet          | Alzheimer's AND "DASH" diet          | Memory loss AND "DASH" diet          | Healthy brain AND "DASH" diet          |
|                                      | Weight loss                        | Dementia AND "weight loss"        | Alzheimer's AND "weight loss"        | Memory loss AND "weight loss"        | Healthy brain AND "weight loss"        |
|                                      | Eating difficulty                  | Dementia AND eating difficulty    | Alzheimer's AND eating difficulty    | Memory loss AND eating difficulty    | Healthy brain AND eating difficulty    |

<sup>a</sup>Refers to terms related to brain health, the types of dementia and stages of dementia.

<sup>b</sup>Refers to terms related to nutrition for the prevention and/or treatment of dementia and nutrition issues related to dementia.

**Table S2.** Top 10 English-speaking countries where the search term ‘dementia’ has the highest interest over the past 12 months from Google Trends.

| Google Trends Rank | Country <sup>a</sup> |
|--------------------|----------------------|
| 1                  | United Kingdom       |
| 2                  | Australia            |
| 3                  | Ireland              |
| 4                  | New Zealand          |
| 5                  | Singapore            |
| 6                  | United States        |
| 7                  | Canada               |
| 8                  | Ghana                |
| 9                  | South Africa         |
| 10                 | Philippines          |

<sup>a</sup>List of countries obtained from Google Trends on August 30, 2021[26].

**Table S3.** Webpage contexts and applicability of ESPEN and WHO guidelines for assessment of content accuracy.

| Webpage context                            | ESPEN guideline <sup>a</sup> | WHO guideline <sup>b</sup> |
|--------------------------------------------|------------------------------|----------------------------|
| Prevention of dementia <sup>c</sup>        | 10a-10g, 12-14               | All                        |
| Treatment of dementia (early to mid-stage) | 1-14                         | None                       |
| Treatment of dementia (late/end-stage)     | 15-20                        | None                       |
| Prevention and treatment of dementia       | 1-14                         | All                        |
| Dietary supplements <sup>d</sup>           | 10a-10g                      | 1c <sup>e</sup>            |

Abbreviations: ESPEN, European Society for Clinical Nutrition and Metabolism; WHO, World Health Organisation; MIND, Mediterranean-DASH Intervention for Neurodegenerative Delay.

<sup>a</sup>ESPEN guidelines on nutrition in dementia[22].

<sup>b</sup>Risk reduction of cognitive decline and Dementia: WHO guidelines[3].

<sup>c</sup>Includes preventing onset of cognitive impairment and further cognitive decline from mild cognitive impairment (MCI) to dementia.

<sup>d</sup>Refers to webpages that include the sole discussion of dietary supplements in brain health and/or treatment/prevention of dementia.

<sup>e</sup>Refers to “Nutritional Interventions” WHO guideline on vitamins B and E, polyunsaturated fatty acids and multi-complex supplementation.

## References

26. Google. Trends Help. Available online: <https://support.google.com/trends/answer/4355212> (accessed on 30 August 2021).
22. Volkert, D.; Chourdakis, M.; Faxen-Irving, G.; Frühwald, T.; Landi, F.; Suominen, M.H.; Vandewoude, M.; Wirth, R.; Schneider, S.M. ESPEN guidelines on nutrition in dementia. *Clinical nutrition (Edinburgh, Scotland)* **2015**, *34*, 1052-1073, doi:10.1016/j.clnu.2015.09.004.
3. World Health Organisation. *Risk reduction of cognitive decline and dementia: WHO guidelines*; Geneva, 2019.
